# Supplementary material for: Nutrient Intake and Its Association with Appendicular Total Lean Mass and Muscle Function and Strength in Older Adults: A Population-Based Study
Source: MDPI journal article supplement (doi:10.3390/nu16040568), 2024-02-19
Supplement: s1 [file s1]

Figure S1: Sample selection

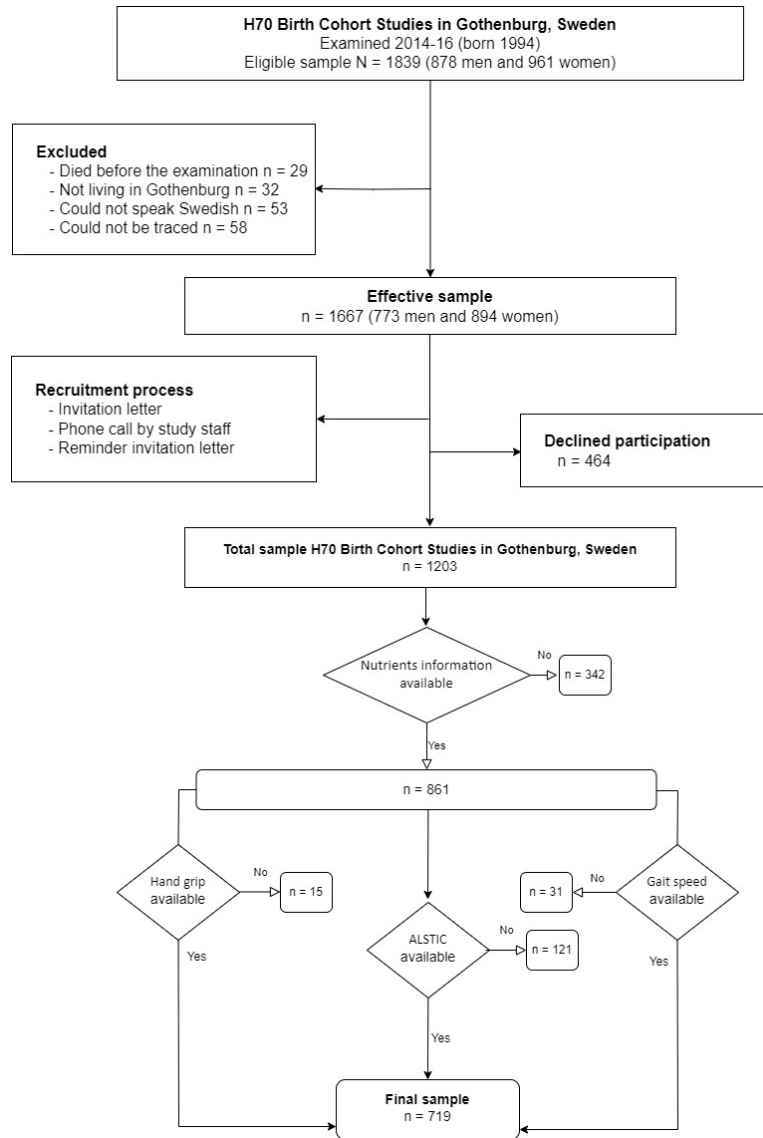

Table S1: Linear association models.

| Variable                        | Appendicular Lean Soft Tissue (kg/m2) |            |         |          |                | Handgrip strength (kPa) |            |         |          |                | Gaitspeed 30 m. (m/s) |            |         |          |                |
|---------------------------------|---------------------------------------|------------|---------|----------|----------------|-------------------------|------------|---------|----------|----------------|-----------------------|------------|---------|----------|----------------|
|                                 | Estimate                              | Std. Error | P value | P.adjust | Spearman's rho | Estimate                | Std. Error | P value | P.adjust | Spearman's rho | Estimate              | Std. Error | P value | P.adjust | Spearman's rho |
| Protein (g)                     | 0,0107                                | 0,0023     | 0,000   | 0,000    | 0.330          | 0,0721                  | 0,0486     | 0,139   | 0,416    | 0.198          | -0,0004               | 0,0006     | 0.506   | 0,416    | 0.062          |
| Fat (g)                         | 0,0021                                | 0,0022     | 0,336   | 0,382    | 0.248          | -0,0213                 | 0,0443     | 0,630   | 0,797    | 0.107          | -0,0005               | 0,0005     | 0.350   | 0,797    | 0.056          |
| Carbohydrates(g)                | -0,0015                               | 0,0008     | 0,067   | 0,107    | 0.240          | -0,0006                 | 0,0170     | 0,972   | 0,981    | 0.150          | -0,0002               | 0,0002     | 0.288   | 0,981    | 0.047          |
| Fibers(g)                       | 0,0063                                | 0,0048     | 0,186   | 0,251    | 0.113          | 0,2197                  | 0,0977     | 0,025   | 0,223    | 0.138          | 0,0021                | 0,0012     | 0.076   | 0,223    | 0.145          |
| Vitamin C(mg)                   | 0,0008                                | 0,0005     | 0,122   | 0,174 †  | -0.043         | 0,0016                  | 0,0105     | 0,881   | 0,981    | -0.009         | 0,0001                | 0,0001     | 0.482   | 0,981    | 0.129          |
| Iron (mg)                       | 0,0439                                | 0,0137     | 0,001   | 0,005 †  | 0.240          | 0,5741                  | 0,2820     | 0,042   | 0,269    | 0.191          | 0,0031                | 0,0034     | 0.364   | 0,269    | 0.114          |
| Calcium(mg)                     | 0,0000                                | 0,0001     | 0,862   | 0,862    | 0.077          | 0,0013                  | 0,0023     | 0,586   | 0,797    | 0.047          | -0,0001               | 0,0000     | 0.016   | 0,797    | -0.003         |
| Retinol equivalent (µg)         | 0,0001                                | 0,0001     | 0,008   | 0,017    | 0.167          | 0,0005                  | 0,0011     | 0,675   | 0,797    | 0.074          | 0,0000                | 0,0000     | 0.663   | 0,797    | 0.003          |
| Vitamin D(µg)                   | 0,0292                                | 0,0089     | 0,001   | 0,004    | 0.219          | -0,0060                 | 0,1838     | 0,974   | 0,981    | 0.095          | 0,0007                | 0,0022     | 0.742   | 0,981    | 0.075          |
| Vitamin E(mg)                   | 0,0032                                | 0,0034     | 0,340   | 0,382    | 0.111          | 0,2116                  | 0,0687     | 0,002   | 0,058 †  | 0.039          | -0,0002               | 0,0008     | 0.810   | 0,058    | 0.079          |
| Thiamine(mg)                    | 0,2178                                | 0,1240     | 0,079   | 0,119    | 0.267          | 2,4390                  | 2,5400     | 0,337   | 0,759    | 0.178          | -0,0197               | 0,0308     | 0.524   | 0,759    | 0.060          |
| Riboflavin(mg)                  | 0,2068                                | 0,0838     | 0,014   | 0,029    | 0.229          | 1,1740                  | 1,7240     | 0,496   | 0,797    | 0.125          | -0,0538               | 0,0208     | 0.010   | 0,797 †  | 0.045          |
| Niacin equivalent (mg)          | 0,0176                                | 0,0049     | 0,000   | 0,003    | 0.367          | 0,0523                  | 0,1023     | 0,609   | 0,797    | 0.220          | 0,0008                | 0,0012     | 0.510   | 0,797    | 0.094          |
| Vitamin B6 (mg)                 | 0,0957                                | 0,0515     | 0,064   | 0,107    | 0.175          | 2,6402                  | 1,0537     | 0,012   | 0,167    | 0.127          | 0,0120                | 0,0128     | 0.347   | 0,167    | 0.148          |
| Vitamin B12 (µg)                | 0,0397                                | 0,0104     | 0,000   | 0,001    | 0.231          | 0,1225                  | 0,2165     | 0,571   | 0,797    | 0.125          | -0,0025               | 0,0026     | 0.343   | 0,797    | 0.023          |
| Phosphorus (mg)                 | 0,0004                                | 0,0001     | 0,007   | 0,016    | 0.263          | 0,0053                  | 0,0027     | 0,050   | 0,269    | 0.175          | 0,0000                | 0,0000     | 0.423   | 0,269    | 0.062          |
| Magnesium(mg)                   | 0,0005                                | 0,0005     | 0,280   | 0,360    | 0.220          | 0,0098                  | 0,0095     | 0,302   | 0,741    | 0.163          | 0,0002                | 0,0001     | 0.057   | 0,741    | 0.128          |
| Potassium(mg)                   | 0,0001                                | 0,0000     | 0,027   | 0,048    | 0.212          | 0,0004                  | 0,0010     | 0,665   | 0,797    | 0.154          | 0,0000                | 0,0000     | 0.223   | 0,797    | 0.124          |
| Zinc (mg)                       | 0,0604                                | 0,0172     | 0,000   | 0,003    | 0.302          | 0,6027                  | 0,3556     | 0,091   | 0,349    | 0.189          | -0,0079               | 0,0043     | 0.066   | 0,349    | 0.034          |
| Alcohol(g)                      | -0,0017                               | 0,0024     | 0,489   | 0,528    | 0.165          | 0,0207                  | 0,0499     | 0,679   | 0,797    | 0.108          | 0,0005                | 0,0006     | 0.370   | 0,797    | 0.099          |
| Saturated fatty acids(g)        | -0,0019                               | 0,0038     | 0,626   | 0,650    | 0.189          | -0,0019                 | 0,0780     | 0,981   | 0,981    | 0.088          | -0,0016               | 0,0009     | 0.100   | 0,981    | 0.049          |
| Monounsaturated fatty acids (g) | 0,0053                                | 0,0052     | 0,308   | 0,378    | 0.264          | -0,0736                 | 0,1066     | 0,490   | 0,797    | 0.109          | -0,0012               | 0,0013     | 0.369   | 0,797    | 0.042          |

|                                 |        |        |       |         |       |         |        |       |       |       |        |        |       |       |       |
|---------------------------------|--------|--------|-------|---------|-------|---------|--------|-------|-------|-------|--------|--------|-------|-------|-------|
| Polyunsaturated fatty acids (g) | 0,0171 | 0,0072 | 0,017 | 0,034   | 0.190 | -0,0775 | 0,1477 | 0,600 | 0,737 | 0.121 | 0,0017 | 0,0018 | 0.343 | 0,737 | 0.090 |
| EPA (Fatty acid 20:5) (g)       | 0,5892 | 0,1968 | 0,003 | 0,008   | 0.117 | 4,4431  | 4,0505 | 0,273 | 0,797 | 0.080 | 0,0289 | 0,0491 | 0.557 | 0,797 | 0.105 |
| DHA (Fatty acid 22:6) (g)       | 0,2978 | 0,0875 | 0,001 | 0,003   | 0.125 | 0,8009  | 1,8062 | 0,658 | 0,797 | 0.068 | 0,0195 | 0,0219 | 0.372 | 0,797 | 0.087 |
| Folate (µg)                     | 0,0012 | 0,0004 | 0,002 | 0,006 † | 0.087 | 0,0048  | 0,0080 | 0,548 | 0,269 | 0.089 | 0,0001 | 0,0001 | 0.175 | 0,269 | 0.157 |
| Selenium (µg)                   | 0,0109 | 0,0024 | 0,000 | 0,000   | 0.227 | 0,0925  | 0,0491 | 0,060 | 0,416 | 0.124 | 0,0002 | 0,0006 | 0.712 | 0,416 | 0.092 |

† Significant interaction with sex
